# Supplementary material for: A Real Time PCR Platform for the Simultaneous Quantification of Total and Extrachromosomal HIV DNA Forms in Blood of HIV-1 Infected Patients
Source: PLOS journal article supplement (doi:10.1371/journal.pone.0111919), 2014-11-03
Supplement: S2 (10.1371/journal.pone.0111919.s002) [file journal.pone.0111919.s002]

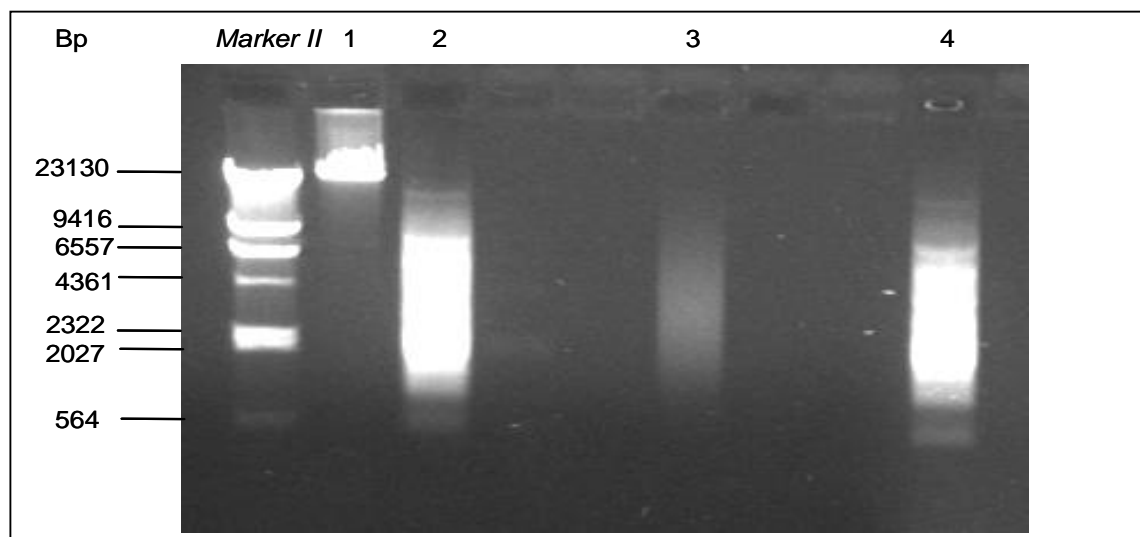

**Figure S2** Gel electrophoresis analysis of HMW DNA and Marker II eluate fractions using QIAprep miniprep kit (Qiagen). Only one representative experiment is shown.

Lane1: 5  $\mu$ g of cellular genomic DNA extracted with phenol procedure .

Lane 3: eluate fraction of HMW DNA sample alone (5  $\mu$ g).

Lane 4: eluate fraction of Marker II alone (5  $\mu$ g). The absence of DNA fragment > 10 kb was evident.

In the lane 2 we showed eluate fraction of a DNA pool of 2.5  $\mu$ g of DNA plus an equal amount of Marker II to better simulate an HIV-1 infected sample. Only DNA <10 kb (about genome size of HIV-1 ) was recovered.

All eluate fractions show the absence of DNA fragments > 10 Kb.

The images were acquired using a Gel Doc TM 1000 Video Gel Documentation System with Molecular Analysts software version 2.1 (Bio-Rad, Hercules, CA, USA), exceeding the saturation to better reveal the rate of DNA degradation.
