# Supplementary material for: A Real Time PCR Platform for the Simultaneous Quantification of Total and Extrachromosomal HIV DNA Forms in Blood of HIV-1 Infected Patients
Source: PLOS journal article supplement (doi:10.1371/journal.pone.0111919), 2014-11-03
Supplement: S7 (10.1371/journal.pone.0111919.s007) [file journal.pone.0111919.s007]

**Table S5** Quantification of total HIV DNA copy number in three different samples tested in three separate experiments

| Run                      | Sample 1 |        |        | Sample 2 |       |        | Sample 3 |        |        |
|--------------------------|----------|--------|--------|----------|-------|--------|----------|--------|--------|
|                          | Exp 1    | Exp 2  | Exp 3  | Exp 1    | Exp 2 | Exp 3  | Exp 1    | Exp 2  | Exp 3  |
| 1 <sup>st</sup> qPCR     | 6        | 6      | 5      | 30       | 33    | 33     | 6        | 9      | 11     |
| 1 <sup>st</sup> qPCR     | 3        | 8      | 5      | 32       | 37    | 32     | 8        | 6      | 10     |
| 2 <sup>nd</sup> qPCR     | 3        | 6      | 6      | 38       | 37    | 34     | 8        | 8      | 5      |
| 2 <sup>nd</sup> qPCR     | 4        | 4      | 1      | 38       | 33    | 36     | 5        | 8      | 8      |
| 2 <sup>nd</sup> qPCR     | 2        | 7      | 6      | 32       | 36    | 42     | 8        | 6      | 7      |
| 2 <sup>nd</sup> qPCR     | 4        | 3      | 4      | 31       | 36    | 39     | 11       | 7      | 10     |
| 2 <sup>nd</sup> qPCR     | 3        | 3      | 5      | 39       | 32    | 40     | 10       | 9      | 5      |
| 2 <sup>nd</sup> qPCR     | 2        | 6      | 4      | 34       | 35    | 33     | 5        | 8      | 8      |
| Coefficient of variation | 38.59%   | 34.36% | 35.63% | 10.44%   | 5.62% | 10.40% | 28.85%   | 15.58% | 28.35% |
| Lower 95% CI of mean     | 2        | 4      | 3      | 31       | 33    | 33     | 6        | 7      | 6      |
| Upper 95% CI of mean     | 4        | 7      | 6      | 37       | 37    | 39     | 9        | 9      | 10     |
| Sum                      | 27       | 43     | 36     | 274      | 279   | 289    | 61       | 61     | 64     |
| Copies/ $\mu$ g of DNA   | 7        | 11     | 9      | 68       | 70    | 72     | 15       | 15     | 16     |

The result was obtained dividing the sum of the copy number from a total of eight replicates (two 0.5  $\mu$ g replicates in the 1<sup>st</sup> qPCR and six 0.5  $\mu$ g replicates in the 2<sup>nd</sup> qPCR ) by 4 and expressed as HIV DNA copy number/ $\mu$ g of DNA. See details in Materials and Methods section for samples quantified near or detected below the QL (<2 copies) in the 1<sup>st</sup> qPCR.
