# Supplementary material for: A Real Time PCR Platform for the Simultaneous Quantification of Total and Extrachromosomal HIV DNA Forms in Blood of HIV-1 Infected Patients
Source: PLOS journal article supplement (doi:10.1371/journal.pone.0111919), 2014-11-03
Supplement: S8 (10.1371/journal.pone.0111919.s008) [file journal.pone.0111919.s008]

**Table S6** Cross-contamination level of HMW DNA measured in eluate fraction by qPCR of  $\beta$ -actin housekeeping gene

| Sample        | ng/qPCR       | ng in eluate fraction | % of contamination |
|---------------|---------------|-----------------------|--------------------|
| 1             | 3.4           | 180.2                 | 5.1                |
| 2             | 2.7           | 148.5                 | 4.2                |
| 3             | 1.7           | 90.1                  | 2.6                |
| 4             | 3.5           | 185.5                 | 5.3                |
| 5             | 2.2           | 121.0                 | 3.4                |
| 6             | 3.2           | 169.6                 | 4.8                |
| 7             | 3.5           | 185.5                 | 5.3                |
| 8             | 2.3           | 115.0                 | 3.3                |
| 9             | 3.5           | 201.25                | 5.7                |
| 10            | 4.3           | 227.9                 | 6.5                |
| 11            | 3.0           | 172.5                 | 4.9                |
| 12            | 2.9           | 145.0                 | 4.1                |
| 13            | 2.9           | 153.7                 | 4.4                |
| 14            | 2.4           | 127.2                 | 3.6                |
| 15            | 2.6           | 135.2                 | 3.8                |
| 16            | 4.8           | 254.4                 | 7.2                |
| 17            | 4.5           | 238.5                 | 6.8                |
| 18            | 4.0           | 212.0                 | 6.0                |
| 19            | 4.7           | 230.3                 | 6.5                |
| 20            | 4.5           | 238.5                 | 6.8                |
| Mean $\pm$ SD | 3.5 $\pm$ 1.2 | 176.6 $\pm$ 47.1      | 5.0 $\pm$ 1.4      |

The contamination from HMW DNA fragments was evaluated in PCR reaction (ng/qPCR, 2  $\mu$ l of eluate fraction were tested in triplicate) and in the total volume of the eluate fraction (varying from sample to sample). Percentage of contamination is expressed as % versus the total DNA amount loaded in the chromatographic column (3529 ng, see Materials and Methods).
